# Supplementary material for: Revision of the Late Jurassic deep-water teleosauroid crocodylomorph Teleosaurus megarhinus Hulke, 1871 and evidence of pelagic adaptations in Teleosauroidea
Source: PeerJ. 2019 Apr 2;7:e6646. doi: 10.7717/peerj.6646 (PMC6450380; doi:10.7717/peerj.6646)
Supplement: Data S2 — Humerus, femur and tibia measurements of extant crocodylians and Thalattosuchians [file peerj-07-6646-s003.xlsx]

## Sheet: HF
	specimen	Taxon	Humerus	Femur	H:F
	MNHN.F.CNJ 79	Aeolodon priscus	90	250	0.36
Tel	NHMUK PV OR 14792	‘Steneosaurus’ gracilirostris	113.48	165.66	0.685018
teleosauroids	CAMSM J.1420	My. nasutus	199.76	394.42	0.506465
teleosauroids	NHMUK PV R 2617	My. nasutus	211	400	0.5275
teleosauroids	SMNS 9930	Platysuchus multiscobiculatus	140	205	0.682927
teleosauroids	UH1	Platysuchus multiscobiculatus	109	150.4	0.724734
teleosauroids	UH1	Platysuchus multiscobiculatus	105	138	0.76087		90
teleosauroids	MMG BwJ 565;	‘Steneosarus’ bollensis	118.59	220.23	0.538482
teleosauroids	SMNS 18672	‘Steneosarus’ bollensis	129.21	197.35	0.654725
teleosauroids	GPIT-RE-9427	‘Steneosarus’ bollensis	204.46	469.15	0.435809
teleosauroids	SMNS 51984;	‘Steneosarus’ bollensis	136.31	213.15	0.639503
teleosauroids	GPIT Re 1193/2	‘Steneosarus’ bollensis	205	345	0.594203
teleosauroids	GPIT Re 1193/3	‘Steneosarus’ bollensis	227	395	0.574684
teleosauroids	NHMUS M597 1904	‘Steneosarus’ bollensis	120	205	0.585366
teleosauroids	NHMUS no number (4)	‘Steneosarus’ bollensis	109	180	0.605556
teleosauroids	SMNS 51957	‘Steneosarus’ bollensis	162	270	0.6
teleosauroids	SMNS 58876	‘Steneosarus’ bollensis	139.4	230	0.606087
teleosauroids	SMNS 59736	‘Steneosarus’ bollensis	139	230	0.604348
teleosauroids	SMNS 849	‘Steneosarus’ bollensis	130	225	0.577778
teleosauroids	NHMUK PV R 3806	S leedsi	128	300	0.426667
teleosauroids	NHMUK PV R2619	S leedsi	102	250	0.408
teleosauroids	PETMG R178	Steneosarus edwardsi	205.98	429.59	0.47948
teleosauroids	NHMUK PV R 3701	S. durobrivensis (HT)	123	320	0.384375
teleosauroids	NHMUK PV R 3168	L. obtusidens	192	456	0.421053
basal metriorhynchoids	NHB M62 2516	Pelagosaurus	58.5	101	0.579208
basal metriorhynchoids	SMSN 17758	Pelagosaurus typus	67	107	0.626168
metriorhynchids	NHMUK PV R 2032	Me. superciliosus	79	250	0.316
metriorhynchids	NHMUK PV R 2051	Me. superciliosus	58	193	0.300518
metriorhynchids	NHMUK PV R 3015	Gr. leedsi	52	210	0.247619
metriorhynchids	NHMUK PV R 3014	Gr. leedsi	43	178	0.241573
metriorhynchids	BRSMG Cd7203	To. carpenteri	115	350	0.328571
metriorhynchids	MLP 72-IV-7-1 Herrera et al. (2013)	Cr. araucanensis	45	170	0.264706
metriorhynchids	MLP 73-II-27-1 Herrera et al. (2013)	Cr. araucanensis	31	150	0.206667
metriorhynchids	MOZ-PV 5787	Cr. lithographicus	64	205	0.312195
metriorhynchids	GLAHM V	Ty. lythrodectikos	87	258	0.337209
Alligator	AMNH 31563	Alligator mississippiensis	192.6	208.2	0.925072
Alligator	UF 35129	Alligator mississippiensis	231.6	247.8	0.934625
Alligator	BMNH 1954.1.7.30	Alligator sinensis	148.3	164.1	0.903717
Alligator	USNM 292078	Alligator sinensis	122.32	147.08	0.831656
Caiman	AMNH 20584	Caiman crocodilus	150.6	165.7	0.908871
Caiman	FMNH 13062	Caiman crocodilus	79.315	98.55	0.80482
Caiman	AMNH 97300	Caiman yacare	122.4	153.9	0.795322
Caiman	FMNH 9150	Caiman yacare	172.2	182.2	0.945115
Caiman	MCZ 2854a	Caiman latirostris	91.9	115.3	0.797051
Caiman	MCZ 4981	Caiman latirostris	63.4	79.1	0.801517
Melanosuchus	MCZ 4043 (Mook 1921)	Melanosuchus niger	149.4	190.2	0.785489
Melanosuchus	UF 72914	Melanosuchus niger	134.2	166.5	0.806006
Paleosuchus	AMNH 93812	Paleosuchus palpebrosus	71.2	91	0.782418
Paleosuchus	AMNH 97326	Paleosuchus palpebrosus	78.6	101.7	0.772861
Paleosuchus	AMNH 66391	Paleosuchus trigonatus	60.4	76.9	0.785436
Paleosuchus	ZSM 149/1911	Paleosuchus trigonatus	57.3	71.4	0.802521
Crocodylus	FMNH 22030	Crocodylus acutus	228.87	238.19	0.960872
Crocodylus	UF 56580	Crocodylus acutus	233.3	248.9	0.937324
Crocodylus	NTM R25705	Crocodylus johnsoni	135.39	152.68	0.886757
Crocodylus	QM J58446	Crocodylus johnsoni	108.21	120.74	0.896223
Crocodylus	UF 54813	Crocodylus moreletii	152.2	168.3	0.904337
Crocodylus	UF 99071	Crocodylus moreletii	107	110.7	0.966576
Crocodylus	BMNH 1969.1565	Crocodylus niloticus	251.5	295.3	0.851676
Crocodylus	USNM 42150	Crocodylus nilocitus	175	201.2	0.869781
Crocodylus	USNM 211292	Crocodylus novaeguineae	44.95	55.17	0.814754
Crocodylus	FMNH 51691	Crocodylus palustris	141.3	149.6	0.944519
Crocodylus	ZSM 2534/0	Crocodylus palustris	114.3	130.5	0.875862
Crocodylus	NTM R16036	Crocodylus porosus	320.5	360.5	0.889043
Crocodylus	QM J48126	Crocodylus porosus	285	317	0.899054
Crocodylus	AMNH 57773	Crocodylus rhombifer	128.3	157.2	0.816158
Crocodylus	UF 45189	Crocodylus rhombifer	144.3	189.6	0.761076
Gavialis	AMNH 110145	Gavialis gangeticus	164	189.9	0.863612
Gavialis	UF 118998	Gavialis gangeticus	188.5	217.5	0.866667
Mecistops	IRSNB 5233	Mecistops cataphractus	146.5	176.3	0.83097
Mecistops	MCZ 175004	Mecistops cataphractus	61.6	72.1	0.854369
Osteolaemus	BMNH 1983.1130	Osteolaemus tetraspis	89.3	105.7	0.844844
Osteolaemus	UF 99068	Osteolaemus tetrapsis	108.2	122.6	0.882545
Tomistoma	MCZ 12459	Tomistoma schlegelii	181.5	221.1	0.820896
Tomistoma	UF 107493	Tomistoma schlegelii	190.5	209.4	0.909742
fossil	IRSNB R47	Anteophthalmosuchus hooleyi	208	201	1.03483
fossil	USNM 12990	Borealosuchus wilsoni	191.9	219.7	0.873464
fossil	USNM 12957	Boverisuchus vorax	143.7	202.4	0.70998
fossil	AMNH 6780	Navajosuchus mooki	133.4	179.8	0.741935
fossil	SMM P76.28.246	Wannaganosuchus brachymanus	75	97	0.773196
fossil	YPM PU 13799	Alligator prenasalis	97.5	120	0.8125
fossil	FMNH unnumbered	Tsoabichi greenriverensis	29	45.7	0.634573

## Sheet: TF
	specimen	Taxon	Femur	Tibia	T:F
teleosauroids	NHMUK PV R 1086	Aeolodon priscus	68	27	0.397059
teleosauroids	MNHN.F.CNJ 78	Aeolodon priscus	250	116	0.464
teleosauroids	NHMUK PV OR 14792	‘Steneosaurus’ gracilirostris	165.66	113.82	0.68707
teleosauroids	CAMSM J.1420	My. nasutus	394.42	201	0.509609
teleosauroids	NHMUK PV R 2617	My. nasutus	400	200	0.5
teleosauroids	SMNS 9930	Platysuchus multiscobiculatus	205	125	0.609756
teleosauroids	UH1	Platysuchus multiscobiculatus	150.4	92.6	0.615691
teleosauroids	UH1	Platysuchus multiscobiculatus	138	96.2	0.697101
teleosauroids	MMG BwJ 565;	‘Steneosarus’ bollensis	220.23	131.51	0.597148
teleosauroids	SMNS 18672	‘Steneosarus’ bollensis	197.35	112.1	0.568026
teleosauroids	GPIT-RE-9427	‘Steneosarus’ bollensis	469.15	225.57	0.480806
teleosauroids	SMNS 51984;	‘Steneosarus’ bollensis	213.15	136.95	0.642505
teleosauroids	NHMUK PV R 3806	S leedsi	300	150	0.5
teleosauroids	NHMUK PV R 2619	S. leedsi	250	115	0.46
teleosauroids	PETMG R178	Steneosarus edwardsi	429.59	219.7	0.511418
teleosauroids	NHMUK PV R 3701	S. durobrivensis (HT)	320	139	0.434375
teleosauroids	NHMUK PV R 2865	S. durobrivensis	385	176	0.457143
teleosauroids	NHMUK PV R 2075	S. durobrivensis	330	153	0.463636
teleosauroids	NHMUK PV R 2076	S. durobrivensis	355	171	0.48169
teleosauroids	NHMUK PV R 3169	S. durobrivensis	417	197	0.472422
teleosauroids	NHMUK PV R 2074	S. hulkei	248	113	0.455645
teleosauroids	NHMUK PV R 3168	L. obtusidens	456	213	0.467105
teleosauroids	Hua 1999	M. Mosae	442	182	0.411765
teleosauroids	GPIT Re 1193/2	‘Steneosarus’ bollensis	345	200	0.57971
teleosauroids	GPIT Re 1193/3	‘Steneosarus’ bollensis	395	210	0.531646
teleosauroids	NHMUS M597 1904	‘Steneosarus’ bollensis	205	113	0.55122
teleosauroids	NHMUS no number (4)	‘Steneosarus’ bollensis	180	105	0.583333
teleosauroids	SMNS 51957	‘Steneosarus’ bollensis	270	165	0.611111
teleosauroids	SMNS 58876	‘Steneosarus’ bollensis	230	123	0.534783
teleosauroids	SMNS 59736	‘Steneosarus’ bollensis	230	123	0.534783
teleosauroids	SMNS 849	‘Steneosarus’ bollensis	225	127.5	0.566667
basal metriorhynchoids	NHB M62 2516	Pelagosaurus typus	101	52	0.514851
basal metriorhynchoids	SMSN 17758	Pelagosaurus typus	107	60	0.560748
basal metriorhynchoids	MNHN 1883-14	Pelagosaurus typus	98	60	0.612245
basal metriorhynchoids		Magyarosuchus	360	213	0.591667
metriorhynchids	NHMUK PV R 2033	Me. superciliosus	254	83	0.326772
Met	NHMUK PV R 2054	Me. superciliosus	260	89	0.342308
Met	NHMUK PV R 2049	Me. superciliosus	226	72	0.318584
Met	NHMUK PV R 2618	M. brachyrhynchus	170	73	0.429412
Met	NHMUK PV R 3014	Gr. leedsi	178	68	0.382022
Met	MOZ-PV 5787	Cr. lithographicus	205	56	0.273171
extant	AMNH 31563	Alligator mississippiensis	208.2	162.2	0.779059
extant	UF 35129	Alligator mississippiensis	247.8	182.2	0.73527
extant	BMNH 1954.1.7.30	Alligator sinensis	164.1	128.6	0.783668
extant	USNM 292078	Alligator sinensis	147.08	113.74	0.773321
extant	AMNH 20584	Caiman crocodilus	165.7	132	0.79662
extant	FMNH 13062	Caiman crocodilus	98.55	78.935	0.800964
extant	AMNH 97300	Caiman yacare	153.9	120.7	0.784276
extant	FMNH 9150	Caiman yacare	182.2	138.035	0.757602
extant	MCZ 2854a	Caiman latirostris	115.3	91.1	0.790113
extant	MCZ 4981	Caiman latirostris	79.1	63.9	0.807838
extant	MCZ 4043 (Mook 1921)	Melanosuchus niger	190.2	152	0.799159
extant	UF 72914	Melanosuchus niger	166.5	130.1	0.781381
extant	AMNH 93812	Paleosuchus palpebrosus	91	74	0.813187
extant	AMNH 97326	Paleosuchus palpebrosus	101.7	81	0.79646
extant	AMNH 66391	Paleosuchus trigonatus	76.9	60.8	0.790637
extant	ZSM 149/1911	Paleosuchus trigonatus	71.4	57.8	0.809524
extant	FMNH 22030	Crocodylus acutus	238.19	180.78	0.758974
extant	UF 56580	Crocodylus acutus	248.9	184.5	0.741262
extant	NTM R25705	Crocodylus johnsoni	152.68	110.35	0.722753
extant	QM J58446	Crocodylus johnsoni	120.74	88.34	0.731655
extant	UF 54813	Crocodylus moreletii	168.3	123.7	0.734997
extant	UF 99071	Crocodylus moreletii	110.7	86.2	0.778681
extant	BMNH 1969.1565	Crocodylus niloticus	295.3	193	0.653573
extant	USNM 42150	Crocodylus nilocitus	201.2	163.9	0.814612
extant	USNM 211292	Crocodylus novaeguineae	55.17	43.1	0.781222
extant	FMNH 51691	Crocodylus palustris	149.6	116.4	0.778075
extant	ZSM 2534/0	Crocodylus palustris	130.5	95.5	0.731801
extant	NTM R16036	Crocodylus porosus	360.5	241.5	0.669903
extant	QM J48126	Crocodylus porosus	317	212.2	0.669401
extant	AMNH 57773	Crocodylus rhombifer	157.2	115	0.731552
extant	UF 45189	Crocodylus rhombifer	189.6	127.8	0.674051
extant	AMNH 110145	Gavialis gangeticus	189.9	137.6	0.724592
extant	UF 118998	Gavialis gangeticus	217.5	176.9	0.813333
extant	IRSNB 5233	Mecistops cataphractus	176.3	130.9	0.742484
extant	MCZ 175004	Mecistops cataphractus	72.1	56.5	0.783634
extant	BMNH 1983.1130	Osteolaemus tetraspis	105.7	84.3	0.79754
extant	UF 99068	Osteolaemus tetrapsis	122.6	97.5	0.795269
extant	MCZ 12459	Tomistoma schlegelii	221.1	157.8	0.713704
extant	UF 107493	Tomistoma schlegelii	209.4	155.1	0.740688
fossil	IRSNB R47	Anteophthalmosuchus hooleyi	201	144	0.716418
fossil	MPSC-R1137	Susisuchus sp.	37.6	37.8	1.00532
fossil	USNM 12990	Borealosuchus wilsoni	219.7	160.3	0.729631
fossil	USNM 12957	Boverisuchus vorax	202.4	151.8	0.75
fossil	MGP-PD 27567	Boverisuchus bolcensis	160	120	0.75
fossil	HLMD ME 8008	Allognathosuchus gracilis	47	41	0.87234
fossil	AMNH 6780	Navajosuchus mooki	179.8	125.8	0.699666
fossil	SMM P76.28.246	Wannaganosuchus brachymanus	97	78.1	0.805155
fossil	YPM PU 13799	Alligator prenasalis	120	89.1	0.7425
fossil	AMNH 3219	Necrosuchus ionensis	153.2	124.7	0.813969
fossil	FMNH unnumbered	Tsoabichi greenriverensis	45.7	41	0.897155
fossil	MGP-PD 27568	Asiatosuchus sp. (ht Crocodylus vicetinus)	170	140	0.823529
